# Supplementary material for: ALDH1A1 Contributes to PARP Inhibitor Resistance via Enhancing DNA Repair in BRCA2−/− Ovarian Cancer Cells
Source: Oxford University Press journal article supplement (doi:10.1158/1535-7163.mct-19-0242), 2019-09-18
Supplement: 15357163mct190242-sup-218422_3_supp_5732895_pwrjbj.docx [file 15357163mct190242-sup-218422_3_supp_5732895_pwrjbj.docx]

**PARP inhibitor-induced ALDH1A1 contributes to PARP inhibitor resistance via enhancing DNA repair in BRCA2-/- ovarian cancer cells**

**Lu Liu et al.**

**Supplemental Tables and Figures**

**Supplementary Tables**

**Table S1. siRNA sequences**

| **siRNA** | **Target sequences** |
| --- | --- |
| siBRD4-1 | GAACCUCCCUGAUUACUAU |
| siBRD4-2 | UAAAUGAGCUACCCACAGA |
| siBRD4-3 | UGAGAAAUCUGCCAGUAAU |
| siBRD4-4 | AGCUGAACCUCCCUGAUUA |
| siALDH1A1-1 | GGACAAUGCUGUUGAAUUU |
| siALDH1A1-2 | GCACUGAGCUGUGGAAACA |
| siALDH1A1-3 | CCACGUGGCAUCUUUAAUA |
| siALDH1A1-4 | GAACAGUGUGGGUGAAUUG |

**Table S2. Primers used for real-time PCR and BRCA2 sequencing**

| **Gene name** |  | **Sequences** |
| --- | --- | --- |
| ALDH1A1 | F | 5'-TGTTAGCTGATGCCGACTTG-3' |
| R | 5'-TTCTTAGCCCGCTCAACACT-3' |
| ALDH1A2 | F | 5'-AGGGCAGTTCTTGCAACCATGGAA-3' |
| R | 5'-CACACACTCCAATGGGTTCATGTC-3' |
| ALDH1A3 | F | 5'-ACCTGGAGGTCAAGTTCACCAAGA-3' |
| R | 5'-ACGTCGGGCTTATCTCCTTCTTCC-3' |
| ALDH1B1 | F | 5'-TGCTGCAGAGTGTCAGCAT-3' |
| R | 5'-GGTGGTAGGGTTGACCGTCG-3' |
| ALDH3A1 | F | 5'-TGTGTCAAAGGCGCCATGAGCAAG-3' |
| R | 5'-GGCGTTCCATTCATTCTTGTGCAG-3' |
| ALDH3B1 | F | 5'-ACAAGTCAGCCTTCGAGTCGG-3' |
| R | 5'-AGCACCACACAGTTCCCTGC-3' |
| ALDH3B2 | F | 5'-CATCATCGCACCCTGGAACT-3' |
| R | 5'-CAGCCAGGACCTTCTCTGTG-3' |
| ALDH4A1 | F | 5'-TGCAGTACCAAGTGTCGCCTTT-3' |
| R | 5'-AATCTCCGCTTGGATCACGGTCTT-3' |
| ALDH2 | F | 5'-CCTCTATGTGGCCAACCTG-3' |
| R | 5'-CCAAATCCAGGCACAATGTT-3' |
| GAPDH | F | 5'-GAAGGTGAAGGTCGGAGT-3' |
| R | 5'-GAAGATGGTGATGGGATTTC-3' |
| 18S | F | 5'-CGTTGATTAAGTCCCTGCCCTT-3' |
| R | 5'-TCAAGTTCGACCGTCTTCTCAG-3' |
| **BRCA2 Sequencing** |  |  |
| BRCA2 F6705 |  | 5'-GGAAGATGATGAACTGACAGATT-3' |
| BRCA2 R7205 |  | 5'-GGTCTGCCTGTAGTAATCAAGTG-3' |

**Supplementary Figures**

**Figure S1. Generation of olaparib-resistant BRCA2-/- EOC cell lines.** Two PARPi-resistant cell lines were generated by continuously treating BRCA2-mutated cell line PEO1 and Kuramochi with PARPi olaparib for 6 months. Methylene blue staining assay shows these two resistant cell lines were not only resistant to olaparib, but also resistant to other PARPi Niraparib and Rucaparib. IC50 was shown in figures. Black color: sensitive parental cells; Red color: resistant cells.

**Figure S2. Olaparib treatment expands the ALDHbr cell population**. **A,** Olaparib-resistant EOC cells possess increased ALDHbr cells. The ALDH activity in olaparib-resistant EOC cell line PEO1-R and Kura-R, as well as their corresponding parental cells was analyzed using the ALDEFLUOR assay by flow cytometry. DEAB was used as a negative control. Representative images of flow cytometric analysis were shown. **B,** Olaparib treatment increases ALDHbr cells in EOC cell lines. PEO1 and Kuramochi cells were treated with olaparib (4 µM) for 7 days, The ALDH activity was analyzed, and ALDHbr cells were determined. Representative images of flow cytometric analysis were shown.

**Fig. S3.** ALDH1A2 is the major ALDH family gene contributes to the ALDH activity in ALDHbr cells and olaparib-induced high ALDH activity in Kuramochi cells. Expression of various ALDH family genes in ALDHdim and ALDHbr cells sorted from Kuramochi cells were analyzed using qRT-PCR (A). Kuramochi cells were treated with olaparib (2 µM) for 7 days, expression of various ALDH family genes in these cells were determined using qRT-PCR (B). N = 3, Bar: SD, *: P < 0.05; **: P < 0.01 compared to the ALDHdim group and the DMSO group, respectively.

**Fig. S4. Multiple ALDH isoforms are upregulated in the olaparib-resistant EOC cells.** Expression of various ALDH family genes in olaparib-sensitive and -resistant PEO1 (A) and Kuramochi (B) cells were analyzed using qRT-PCR. N = 3, Bar: SD, **: P < 0.01.

**Figure S5. Downregulation of ALDH1A1 sensitizes olaparib-resistant EOC cells to olaparib treatment.** Kura-R cells weretransfected with ALDH1A1 siRNA-pool for 48 h, treated with olaparib at various doses for 7 days. The ALDEFLUOR assay was used to determine the ALDH activity in these cells after 48 h of transfection (**A**). Cell viability after olaparib treatment was determined using methylene blue staining (**B**). N = 4, Bar: SD, *: P < 0.05 compared with the siCtrl group.

**Figure S6. ALDH+ cells exhibit enhanced DNA repair capacity in BRCA2-/-cells. A,** ALDHdim and ALDHbr cells were sorted from PEO1 cells by Flow cytometry, treated with H2O2 (100 µM) for 30 min, further cultured for various time periods in the H2O2-free medium. γH2AX was visualized using immunofluorescence, and the number of cells with γH2AX foci (>5) was counted. Linear mixed effects model was used for analyzing the rate of disappearance of γH2AX foci between ALDHdim and ALDHbr cells. N = 6, Bar: SD, **: P < 0.01 compared to the ALDHdim group.

**Figure S7. ALDHbr cells and ALDH1A1 overexpression do not restore HR capacity in BRCA2-/- cells. A,** ALDHdim and ALDHbr cells were sorted from PEO1 cells, treated with olaparib (10 µM) for 1 h, further cultured in the drug-free medium for the indicated time periods. Immunofluorescence was conducted to visualize RAD51 foci. **B,** PEO1 cells were transfected with either empty vector or ALDH1A1 expressing vector for 24 h, treated with olaparib (10 µM) for 1 h, further cultured in the drug-free medium for the indicated time periods. Immunofluorescence was conducted to visualize RAD51 foci.

**Figure S8. NCT-501 can efficiently inhibit the olaparib-induced ALDH activity in both olaparib sensitive and resistant EOC cells.** **A,** PEO1, Kuramochi and their corresponding PARPi-resistant cells were treated with NCT-501 at various doses for 7 days, cell viability was determined using methylene blue staining. N=4, bar: SD, *: P < 0.05; **: P < 0.01, compared to control. **B,** PEO1, Kuramochi and their corresponding PARPi-resistant cells were treated with 50 µM NCT-501 for 24 h, qRT-PCR was conducted to determine the expression of ALDH1A1 at mRNA level. N=3, bar: SD. **C**, PEO1, Kuramochi and their corresponding PARPi-resistant cells were treated with either olaparib (4 µM) alone or olaparib (4 µM) + NCT-501 (50 µM) for 24 h, the ALDEFLUOR assay was used to determine the ALDH activity in these cells. DEAB was used as a negative control to gate ALDH-bright cells.

**Figure S9.** **BRCA2 expression in PEO1, Kuramochi, and their corresponding PARPi-resistant cells.** Whole cell lysates were prepared by boiling cell pellets in the SDS lysis buffer. The same amount of protein was subjected to immunoblotting with anti-BRCA2 antibody (Ab-1, Sigma, 1:200). Tubulin was also detected as a loading control.

**Figure S10.** **Olaparib and NCT-501 show an additive effect on cell survival in BRCA2 wild type PEO4 cells.** PEO4 cells were treated with olaparib at various doses and NCT-501 at 50 µM (**A**) or 75 µM (**B**) for 7 days. Methylene blue staining was used to determine cell survival. The CI value was calculated. CI<0.9: synergism; 0.9-1.1: additive effect; >1.1: antagonism. N = 4, Bar: SD.

**Figure S11. NCT-501 can efficiently inhibit the repair of DSBs induced by olaparib in olaparib-resistant EOC cells.** PEO1-R (A, B) and Kura-R-C3 (C, D) cells were treated with olaparib (10 µM) for 1 h, and further cultured in the absence or presence of NCT-501 (50 µM) for 24 h. γH2AX was visualized using immunofluorescence, and the number of cells with γH2AX foci (>5) was counted.
